5. Gazoni FM, Durieux ME, Wells L: Life after death: The aftermath of perioperative catastrophes. *Anesth Analg* 2008; 107:591–600
6. Gazoni FM, Amato PE, Malik ZM, Durieux ME: The impact of perioperative catastrophes on anesthesiologists: Results of a national survey. *Anesth Analg* 2012; 114:596–603

## ANESTHESIOLOGY REFLECTIONS FROM THE WOOD LIBRARY-MUSEUM

# Boston's Cushing Webber and the Late Doctor's Early Use of "Perfectly Safe" Ether

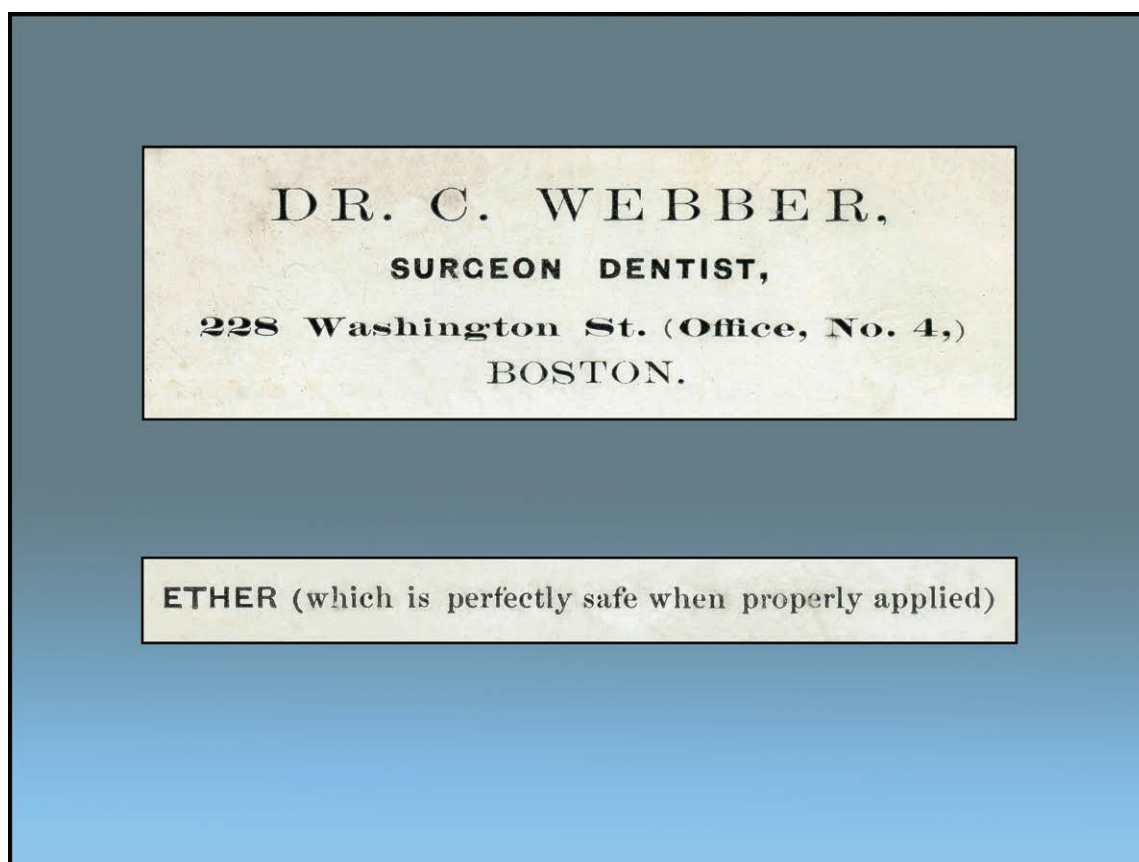

Born in Boothby, Maine, Dr. Cushing Webber began practicing dentistry in Massachusetts in 1844, the year that Dr. Horace Wells demonstrated dental anesthesia with nitrous anesthesia in neighboring Connecticut. After Boston dentist William T. G. Morton demonstrated surgical anesthesia with ether in 1846, Dr. Webber began administering ether anesthetics in his own practice. By 1868 he was advertising his Washington Street dental partnership, with Dr. Charles C. Twichell, in the Boston directory. A compulsive and cautious dentist-anesthetist, Dr. Webber advertised on his business card (*top*, from the Wood Library-Museum's Ben Z. Swanson Collection) how, in his hands, ether was "properly applied" and "perfectly safe" (*bottom*). Quite a taskmaster, he demanded that his patients "be punctual" and that his builders finish his vacation homes on schedule. Across both Massachusetts and Cape Cod Bays, his third summer cottage was completed in 1893, just 2 yr before Dr. Webber passed away from the gastric ulcer that his compulsiveness may have aggravated. (Copyright © the American Society of Anesthesiologists' Wood Library-Museum of Anesthesiology.)

*George S. Bause, M.D., M.P.H., Honorary Curator and Laureate of the History of Anesthesia, Wood Library-Museum of Anesthesiology, Schaumburg, Illinois, and Clinical Associate Professor, Case Western Reserve University, Cleveland, Ohio. UJYC@aol.com.*
